# Supplementary material
Source: publisher site journal article supplement (https://www.dovepress.com/article/355007)
Supplement: Supplementary file 1 [file get_supplementary_file.php]

**Supplemental materials**

**Optical microscopy systems for the detection of unlabeled nanoparticles**

Ralf P. Friedrich1, Mona Kappes1, Iwona Cicha1, Rainer Tietze1, Christian Braun2, Regine Schneider-Stock3, Roland Nagy4, Christoph Alexiou1, Christina Janko1

1Department of Otorhinolaryngology, Head and Neck Surgery, Section of Experimental Oncology and Nanomedicine (SEON), Else Kröner-Fresenius-Stiftung Professorship, Universitätsklinikum Erlangen, 91054 Erlangen, Germany

2Institute of Legal Medicine, Ludwig-Maximilians-Universität München, 80336 München, Germany

3Experimental Tumor Pathology, Institute of Pathology, University Hospital, Friedrich-Alexander-Universität Erlangen-Nürnberg, 91054 Erlangen, Germany

4[Department Elektrotechnik-Elektronik-Informationstechnik (EEI), Friedrich-Alexander-Universität Erlangen-Nürnberg](https://aip.scitation.org/action/doSearch?field1=Affiliation&text1=Department%20Elektrotechnik-Elektronik-Informationstechnik%20(EEI),%20Friedrich-Alexander-Universit%C3%A4t%20Erlangen-N%C3%BCrnberg%20(FAU)&field2=AllField&text2=&Ppub=&Ppub=&AfterYear=&BeforeYear=&access=), 91058 Erlangen, Germany

Correspondence: Christina Janko

Glückstrasse 10a, 91054 Erlangen, Germany

Tel +49 9131 85 43944

Fax +49 9131 85 34828

Email [christina.janko@uk-erlangen.de](mailto:christina.janko@uk-erlangen.de)

Material and methods

***Materials***

Iron (II) chloride tetrahydrate (FeCl2⋅4H2O), Amphotericin B and MEM Non-essential Amino Acid Solution were obtained from Merck (Darmstadt, Germany). Iron (III) chloride hexahydrate (FeCl3⋅6H2O), Triton X-100, sodium hydroxide, sterile Rotilabo® syringe filters with cellulose mixed ester membranes were purchased from Carl Roth (Karlsruhe, Germany). Dialysis bags (Spectra/Por 6) with MWCO of 8 kDa were supplied by Serva Electrophoresis (Heidelberg, Germany). Poly(acrylic acid-co-maleic acid) (PAM) was obtained from Sigma Aldrich (St Louis, MO, USA). Dulbecco’s modified Eagle Medium (DMEM) and trypsin were purchased from PAN-Biotech (Aidenbach, Germany). Fetal bovine serum (FBS) superior, penicillin/streptomycin, GlutaMAX, phosphate buffered saline (PBS) and ProLong™ Gold Antifade Mountant were purchased from Thermo Fisher Scientific (Waltham, MA, USA). PromoFluor 488 Phalloidin from PromoCell GmbH (Heidelberg, Germany) and Hoechst 33342 from Invitrogen (Carlsbad, CA, USA). Ringer’s solution was purchased from Fresenius Kabi AG, Bad Homburg, Germany. Water used in all experiments was of ultrapure quality produced by the Milli-Q® system from Merck (Darmstadt, Germany). Collagenase and hyaluronidase were bought from StemCell Technologies (Vancouver, Canada). Cell culture flasks and pipette tips were purchased from Eppendorf (Hamburg, Germany).

***Synthesis of in situ-coated Poly(acrylic acid-co-maleic acid) SPIONs (SPIONPAM)*** *Poly(acrylic* acid-co-maleic acid)-coated superparamagnetic iron oxide nanoparticles (SPIONPAM) were synthesized as described previously.1,2 In brief, iron oxide nanoparticles were synthesized under argon atmosphere at 80 °C by co-precipitation of iron(II) and iron(III) at a stoichiometric ratio of 1:2. After dialysis, the particles were coated with PAM by diluting the particles in a 25 % (w/v) solution of PAM to a total iron concentration of 5 g/L. Using sodium hydroxide solution (5.0 N), the pH was adjusted to pH 6.5 and the suspension stirred for 24 h. Excess polymer was removed by multiple centrifugation steps and resuspension in ultrapure water.

***Isolation of primary cells and cell culture***

Human vocal fold fibroblasts were isolated from vocal folds (hVFF; approved by the local ethics committee of the Ludwig-Maximilians-Universität München; project number 18-519). First, the tissue was rinsed with PBS containing penicillin/streptomycin. Subsequently, it was digested for 16 h at 37 °C using collagenase and hyaluronidase in DMEM containing penicillin/streptomycin and amphotericin B, followed by centrifugation (90 g, 1 min). The supernatant was discarded and the tissue further digested with 0.01 % trypsin in PBS containing penicillin/streptomycin and Amphotericin B for 30 min at 37 °C before stopping with culture medium and centrifugation (90 g, 1 min). Cells were washed with cell culture medium and again centrifuged (220 g, 3 min). Cells were resuspended in medium. Undigested material was removed using a 100 µm filter. After filtration, cells were seeded in a 6 well plate. The cells were incubated at 37 °C in 5 % CO2 humidified atmosphere. As culture medium for hVFF we used DMEM with 10 % FCS, 1 % penicillin/streptomycin, 1 % Amphotericin, 1 % GlutaMAX and 1 % MEM Non-essential Amino Acid Solution.

***Loading of cells with SPIONs for fluorescence microscopy***

To load the cells with SPIONs, 90 % confluent cells in T75 culture flasks were detached with trypsin and counted with MUSE® Cell Analyzer (Merck-Millipore, Billerica, USA). 250 000 cells were seeded in 2.7 ml medium in each well of a 6-well-plate overnight for adherence. Next day, 300 µl SPIONPAM were added to the medium in final concentrations of 2 µg Fe/mL corresponding to 670 ng Fe/cm2 cell culture plate area. Cells treated with distilled water served as control. Samples were incubated for 24h. Cells were washed with PBS and fixed with 0.5 mL formalin (4 % in PBS) for 10 min. After washing twice with PBS, the cells were permeabilized with 0.5 mL Triton X-100 (0.2 % in PBS) for 10 min. After another washing step with PBS, 0.5 ml blocking solution (5 % FCS in PBS) were added and the cells incubated for 25 min. Then, the samples were stained with PromoFluor 488 Phalloidin (1:100) and Hoechst 33342 (1:2000) for 1h in the dark at room temperature. Subsequently, the cells were washed trice with PBS and embedded in ProLong™ Gold Mounting Medium. Cells were imaged with a Stellaris 5 confocal microscope in fluorescence and reflectance mode (Leica Microsystems, Wetzlar, Germany).

References supplemental materials

1. Blumler P, Friedrich RP, Pereira J, Baun O, Alexiou C, Mailander V. Contactless Nanoparticle-Based Guiding of Cells by Controllable Magnetic Fields. *Nanotechnol Sci Appl.* 2021;14:91-100.

2. Friedrich RP, Zaloga J, Schreiber E, et al. Tissue Plasminogen Activator Binding to Superparamagnetic Iron Oxide Nanoparticle-Covalent Versus Adsorptive Approach. *Nanoscale research letters.* 2016;11(1):297.

Supplementary video

Supplementary video 1: 3D video of the cellular localization of nanoparticles (SPIONPAM) shown in Figure 2.
